# Supplementary material for: Supramolecular scaffolds on glass slides as sugar based rewritable sensors for bacteria
Source: Royal Society of Chemistry journal article supplement (doi:10.1039/c5cc01019e), 2015-01-01

## Supramolecular Scaffolds on Glass Slides as Sugar Based Rewritable Sensor for Bacteria

Madhuri Gade,<sup>a</sup> Ajay Paul,<sup>b</sup> Catherine Alex,<sup>a</sup> Devika Choudhury,<sup>c</sup> Hirekodathakallu V. Thulasiram,<sup>b</sup> Raghavendra Kikkeri<sup>\*a</sup>

<sup>a</sup>Indian Institute of Science Education and Research, Sai Trinity Building, Pashan, Pune 411021, India. Fax: +91-20-25899790; Tel: +91-20-25908207.

<sup>b</sup>Chemical Biology Unit, Division of Organic chemistry, CSIR-National Chemical Laboratory, Dr. Homi Bhabha Road, Pune-411008, India.

<sup>c</sup>Department of Energy Science and Engineering, IIT Bombay, Mumbai-400076, India.

Corresponding Author : [rkikkeri@iiserpune.ac.in](mailto:rkikkeri@iiserpune.ac.in)

### Table of Contents:

1. General Information
2. Synthesis of fucose  $\beta$ -CD derivatives (C-3)
3. Synthesis of ferrocene linker (L-1)
4. Surface functionalization
5. SIMS-TOF characterization
6. XPS Analysis
7. Bacterial growth
8. Concentration dependent bacterial binding assay
9. Rewriting the glass slides for continuous bacterial sensing
10. NMR

#### 1. General Information

All chemicals were reagent grade and used as supplied except where noted. Analytical thin layer chromatography (TLC) was performed on Merck silica gel 60 F254 plates (0.25 mm). Compounds were visualized by UV irradiation or dipping the plate in CAM solution followed by heating. Column chromatography was carried out using force flow of the indicated solvent on Fluka Kieselgel 60 (230–400 mesh). <sup>1</sup>H and <sup>13</sup>C NMR spectra were recorded on Jeol 400 MHz using residual solvents signals as an internal reference (CDCl<sub>3</sub>  $\delta$ H, 7.26 ppm,  $\delta$ c 77.3 ppm and CD<sub>3</sub>OH  $\delta$ H 3.31 ppm,  $\delta$ c 49.0 ppm). The chemical shifts ( $\delta$ ) are reported in *ppm* and

coupling constants ( $J$ ) in Hz. XPS experiments were performed on a VG Micro Tech ESCA 3000 instrument at a pressure of  $< 1 \times 10^{-9}$  Torr. The overall resolution was limited to the bandwidth of X - ray source ( $\sim 1$  eV). The spectra were recorded with monochromatic Al  $K\alpha$  radiation at pass energy of 50 eV and an electron take off angle of  $60^\circ$ . Bacterial images were collected from Zeiss optical microscope at 63X resolution and exciting DAPI, FITC and rhodamine by specific lazars.

### 1. Synthesis of L-fucose $\beta$ -CD (C-3).

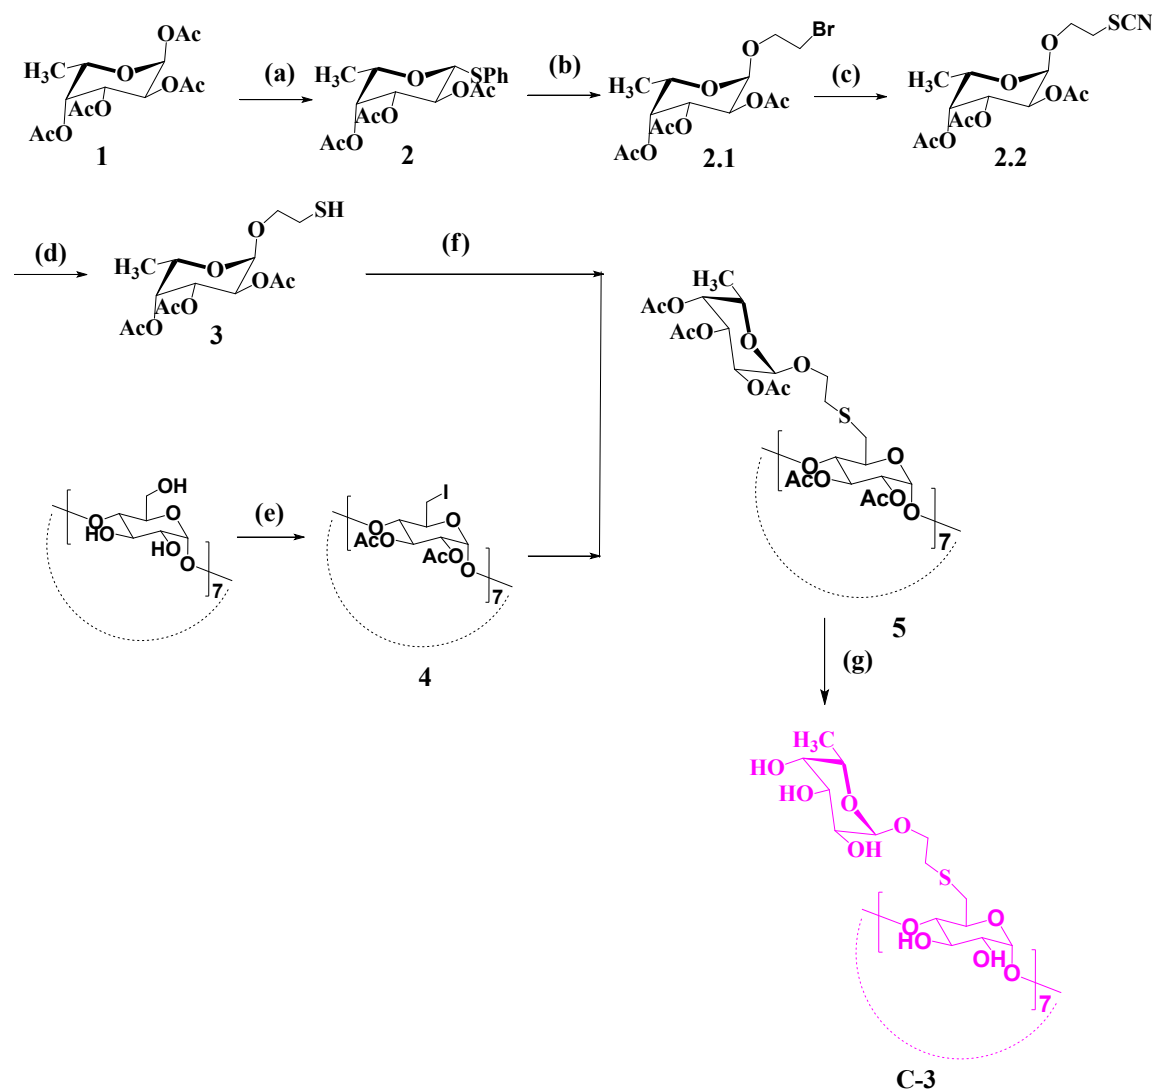

**Scheme S1:** Synthesis of comp **C-3**: (a) Thiophenol/ $\text{BF}_3 \cdot \text{Et}_2\text{O}$ , DCM,  $0^\circ\text{C}$  To RT, 12 h, 91% ; (b) NIS/ $\text{TfOH}$ /bromoethanol, DCM:ACN (2:1),  $-78^\circ\text{C}$  to  $-50^\circ\text{C}$ , 2hr, 38%; (c) KSCN/DMF,  $80^\circ\text{C}$ , 12hr, 95%; (d) Zn/ $\text{AcOH}$ ,  $80^\circ\text{C}$ , 4hr, 76%; (e)  $\text{I}_2$ ,  $\text{PhP}_3$ , DMF,  $80^\circ\text{C}$  16 hr;  $\text{Ac}_2\text{O}/\text{Py}$ , 12 hr, 72% (2 step); (f) **6**,  $\text{Cs}_2\text{CO}_3$ , DMF, RT, 72 hr, 57%; (f) NaOMe, MeOH, 2 hr, 51% .

Comp **2** was prepared by using procedure reported in literature.

### Synthesis of Thiophenol-sugar derivatives (2).

Peracetylated L-fucose **1** (0.6 g, 1.80 mmol) thiophenol (0.2 mL, 0.98 mmol) were dissolved in DCM (10 mL) and maintained 0°C. To the reaction mixture  $\text{BF}_3 \cdot \text{Et}_2\text{O}$  (0.5 mL, 4.14 mmol) was slowly added for half hour and stirred overnight at RT. Completion of reaction was monitored by TLC. After completion, the reaction mixture was diluted with 20 mL DCM and washed with  $\text{NaHCO}_3$  (2 X 20 mL) and brine (2 X 20 mL). Organic layer was dried over anhydrous  $\text{Na}_2\text{SO}_4$  and concentrated under reduced pressure to give crude product, which was further purified on silica gel column chromatography using EtOAc/Pet-ether (1: 1) to get pure thiophenol sugar derivatives (Yield = 0.41 g, 91%).  $^1\text{H}$  NMR (400 MHz,  $\text{CDCl}_3$ ):  $\delta$  7.53-7.50 (m, 2H), 7.35-7.30 (m, 3H), 5.30-5.26 (m, 1H), 5.21 (d,  $J$  = 8.0 Hz, 1H), 5.06 (dd,  $J$  = 3.66, 10.0 Hz, 1H), 4.72 (d,  $J$  = 10.7 Hz, 1H), 3.85 (q,  $J$  = 3.66, 8.0 Hz, 1H), 2.15 (s, 3H) 2.09 (s, 3H), 1.98 (s, 3H), 1.25 (d,  $J$  = 6.41 Hz, 3H);  $^{13}\text{C}$  NMR (100 MHz,  $\text{CDCl}_3$ ):  $\delta$ . 170.71, 170.24, 169.60, 132.98, 132.38, 128.95, 128.02, 86.55, 73.23, 72.50, 70.39, 67.42, 20.95, 20.75, 16.56. HRMS  $m/z$  calc'd for  $\text{C}_{18}\text{H}_{22}\text{O}_7\text{SNa}$ : 405.0984; found: 405.0979.

### Synthesis of Bromoethanol-sugar derivatives (2.1)

L-fucose donor **2** (0.4 g, 1.04 mmol) and bromoethanol (0.37 mL, 5.23 mmol) were dissolved in 2:1 DCM:ACN mixture (10 mL). Then maintain -78 °C for 20 minutes, followed by NIS (0.58 g, 2.61 mmol) and TfOH (0.13 mL, 1.04 mmol) were added at -78 °C. The reaction mixture was allowed to stir at -50 °C for 2 h. Completion of reaction was monitored by TLC. After completion, the reaction mixture was neutralized with triethyl amine, and then added DCM (50 mL) to the reaction mixture, give washing two times with sodium thiosulphate  $\text{Na}_2\text{S}_2\text{O}_3 \cdot 5\text{H}_2\text{O}$  (10 mL) and two times with water (10 mL). Organic layer was dried over anhydrous  $\text{Na}_2\text{SO}_4$  and concentrated under reduced pressure to give crude product, which was further purified on silica gel column chromatography using EtOAc/Pet-ether (70 : 30 ) to get pure bromoethanol sugar derivatives.  $^1\text{H}$  NMR (400 MHz,  $\text{CDCl}_3$ ):  $\delta$  5.26-5.19 (m, 2H), 5.09 (dd,  $J$  = 3.6, 10.1 Hz, 1H) 5.02 (d,  $J$  = 3.6 Hz, 1H), 4.07-4.02 (m, 1H), 3.83-3.76 (m, 2H), 3.46 (t,  $J$  = 11.2 Hz, 2H), 2.18 (s, 3H), 2.08 (s, 3H) 1.99 (s, 3H), 1.24 (d,  $J$  = 6.41 Hz, 3H);  $^{13}\text{C}$  NMR (100 MHz,  $\text{CDCl}_3$ ):  $\delta$ . 170.76, 170.33, 169.75, 96.40, 70.24, 70.21, 69.64, 68.38, 63.63, 62.5, 30.16, 29.76, 20.99, 20.72. HRMS  $m/z$  calc'd for  $\text{C}_{14}\text{H}_{21}\text{O}_8\text{BrNa}$ : 419.0317; found: 419.0317.

### Synthesis of thiocyanate substituted sugar (2.2).

Per-acetylated bromoethanol-sugar derivative (0.2 g, 0.50 mmol) was dissolved in DMF (10 mL). Then potassium thiocyanate (0.19 g, 2.02 mmol) was added and stirred at 80 °C for 12 hr. The reaction mixture was diluted with 100 ml ethyl acetate and washed several times with water. The organic layer was dried over anhydrous Na<sub>2</sub>SO<sub>4</sub> and concentrated under reduced pressure to give crude product, which was further purified by flash column using petroleum ether: ethylacetate (75 : 25) (Yield = 0.20 g, 95%). <sup>1</sup>H NMR (400 MHz, CDCl<sub>3</sub>): δ 5.26-5.14 (m, 2H), 5.11 (dd, *J* = 3.6, 10.1 Hz, 1H) 4.98 (d, *J* = 3.6 Hz, 1H), 4.05-3.95 (m, 1H), 3.83-3.76 (m, 2H), 3.23-3.05 (m, 2H), 2.18 (s, 3H), 2.08 (s, 3H) 1.99 (s, 3H), 1.24 (d, *J* = 6.41 Hz, 3H); <sup>13</sup>C NMR (100 MHz, CDCl<sub>3</sub>): δ. 170.67, 170.22, 169.66, 111.82, 97.4, 71.17, 70.12, 69.84, 68.61, 63.02, 33.79, 29.73, 20.90, 20.73, 20.67, 16.06. HRMS *m/z* calc'd for C<sub>15</sub>H<sub>21</sub>NO<sub>8</sub>SNa: 398.0885; found: 398.0883.

### **Synthesis of thio substituted sugar (3).**

Peracetylated thiocyanate-sugar derivative (0.23 g, 0.61 mmol) was dissolved in glacial acetic acid (30 mL). Then Zn dust (0.16 g, 2.45mmol) was added and refluxed at 80 °C for 4 h. The compound was filtered to remove zinc dust. The organic layer was quenched with water (50 mL). Then product was extracted with EtOAc (3 X 50 mL) and dried over anhydrous Na<sub>2</sub>SO<sub>4</sub>. Organic layer was concentrated under reduced pressure to give product, which was further used for next reaction without purification (Yield = 0.28 g, 76%). <sup>1</sup>H NMR (400 MHz, CDCl<sub>3</sub>): δ δ 5.29-5.17 (m, 2H), 5.13 (dd, *J* = 3.66, 10.1 Hz, 1H), 5.01 (d, *J* = 3.6 Hz, 1H), 4.14-4.03 (m, 1H), 3.87-3.80 (m, 1H), 3.69-3.57 (m, 1H), 2.82-2.66 (m, 2H), 2.21 (s, 3H), 2.11 (s, 3H) 2.02 (s, 3H), 1.29 (d, *J* = 6.41 Hz, 3H); <sup>13</sup>C NMR (100 MHz, CDCl<sub>3</sub>): δ. 170.73, 170.15, 169.62, 98.08, 71.24, 70.28, 69.12, 68.86, 63.6, 29.67, 24.35, 20.63, 16.09. HRMS *m/z* calc'd for C<sub>14</sub>H<sub>22</sub>O<sub>8</sub>SNa: 373.0933; found: 373.0932.

### **Synthesis of sugar substituted β-cyclodextrin (5).**

The per-acetylated thio-sugar (0.18 g, 0.52 mmol) in DMF (10 mL) was added to per-acetylated 6'-Iodo- β-cyclodextrin **4** (0.1 g, 0.04 mmol) and Cs<sub>2</sub>CO<sub>3</sub> (0.168 g, 0.52 mmol) and stirred at room temperature for 72 h. The reaction mixture was diluted with 100 ml ethyl acetate and washed several times with water. The organic layer was dried over anhydrous Na<sub>2</sub>SO<sub>4</sub> and concentrated under reduced pressure to give crude product, which was further purified by flash column using DCM:MeOH (5-7%) (Yield = 0.27 g, 57%). <sup>1</sup>H NMR (400 MHz, CDCl<sub>3</sub>): δ 5.23 (d, *J* = 3.21 Hz, 7H), 5.15-4.89 (m, 34H), 4.80-4.75 (m, 7H), 4.14-4.09 (m, 7H), 4.07-4.01 (m, 7H), 3.87-3.82 (m, 14H), 3.66-3.62 (m, 7H) 3.16-2.92 (m, 14H), 2.87-

2.75 (m, 14), 2.17 (s, 18H), 2.09-2.03 (m, 66H), 1.96 (m, 21H), 1.21 (d,  $J = 6.41$  Hz, 21H);  $^{13}\text{C}$  NMR (100 MHz,  $\text{CDCl}_3$ ):  $\delta$ . 170.73, 170.15, 169.55, 101.08, 71.24, 70.28, 69.12, 68.86, 33.81, 31.90, 29.66, 22.67, 20.95, 20.79, 20.71, 20.63, 16.09. HRMS  $m/z$  calc'd for  $\text{C}_{168}\text{H}_{238}\text{O}_9\text{S}_7\text{Na}$ : 4070.1583; found:  $[\text{M}+\text{Na}/2]^+$ .2036.4113.

### Deacetylation of Per-glycosylated $\beta$ -cyclodextrin derivatives (C-3).

The sugar-substituted  $\beta$ -cyclodextrin (0.05 g, 0.01 mmol) was dissolved in methanol (10 mL). Then sodium methoxide (9 mg, 0.24 mmol) was added and stirred for 2 h at RT. The mixture was neutralized with amberlite-IR120H<sup>+</sup> resin, filtered and concentrated *in vacuo* to afford the final compound (C-3) (Yield = 51 mg, 51%).  $^1\text{H}$  NMR (400 MHz,  $\text{CD}_3\text{OD}$ ):  $\delta$  5.12-5.09 (m, 7H), 4.37 (d,  $J = 3.6$  Hz, 7H), 4.15-3.97 (m, 10H), 3.96-3.85 (m, 18H), 3.79-3.72 (m, 17H), 3.64-3.61 (m, 17H), 3.55-3.51 (m, 7H), 3.49-3.46 (m, 7H), 3.27-3.25 (m, 7H), 3.02-2.89 (m, 21H), 1.25 (bs, 21H);  $^{13}\text{C}$  NMR (100 MHz,  $\text{CD}_3\text{OD}$ ):  $\delta$ . 120.87, 72.98, 72.96, 72.95, 72.04, 71.98, 71.28, 70.90, 70.47, 68.97, 68.90, 68.79, 32.12, 32.07, 15.70. HRMS  $m/z$  calc'd for  $\text{C}_{24}\text{H}_{46}\text{O}_6$  Na: 2599.7987; found: 2599.81.

### 3. Synthesis of Ferrocene derivatives

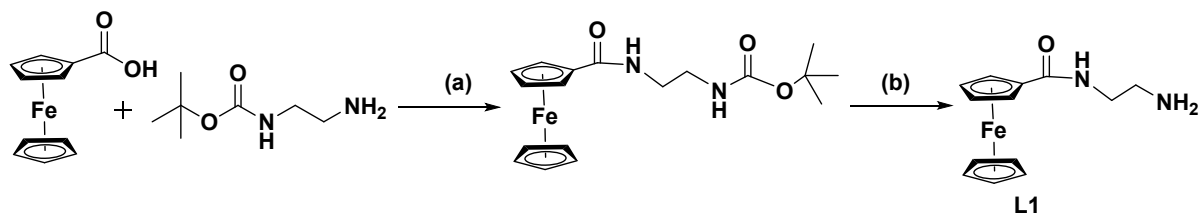

**Scheme S2:** Synthesis of comp L-1: (a) EDC/HOBt/DIPEA, DMF, RT, 12 hr, 92%; (b) 40% TFA/DCM, 2hr, 83%.

#### Synthesis of ferrocene derivative (1).

Ferrocene carboxylic acid (0.5 g, 2.17 mmol) and mono-boc ethylene diamine (0.34 g, 2.17 mmol) was dissolved in dry DMF (10 mL). Then HOBt (0.35 g, 2.60 mmol) and EDC (0.45 g, 2.60 mmol) were added. The reaction mixture was stirred at RT for 12 hr. After completion, the reaction mixture was diluted with 50 ml water and extracted with ethyl acetate (3  $\times$  50 mL). The organic layer was dried over anhydrous  $\text{Na}_2\text{SO}_4$  and concentrated under reduced pressure to give crude product, which was further purified by flash column using petroleum ether: ethylacetate (Yield = 0.87 g 92%),  $^1\text{H}$  NMR (400 MHz,  $\text{CDCl}_3$ ):  $\delta$  6.81 (bs, 1H), 5.13 (s, 1H), 4.72 (bs, 2H), 4.35 (bs, 2H), 4.20 (s, 5H), 3.47 (q,  $J = 8.0$  Hz, 2H),

3.36 (q,  $J = 8.0$  Hz, 2H), 1.46 (s, 9H);  $^{13}\text{C}$  NMR (100 MHz,  $\text{CDCl}_3$ ):  $\delta$ . 171.77, 79.99, 70.66, 69.89, 68.29, 41.32, 40.57, 28.50. HRMS  $m/z$  calc'd for  $\text{C}_{18}\text{H}_{24}\text{FeN}_2\text{O}_3$ : 373.1215; found: 373.1220.

### Synthesis of L-1.

To ferrocene derivative 6 added 40% TFA in DCM was added, which was stirred for 2 hr. Then TFA was evaporated under reduced pressure which was further purified by column using DCM: Methanol (Yield = 0.87 g, 83%).

$^1\text{H}$  NMR (400 MHz,  $\text{CD}_3\text{OD}$ ):  $\delta$  4.85 (bs, 2H), 4.46 (bs, 2H), 4.24 (s, 5H), 3.63 (t,  $J = 12.0$  Hz, 2H), 3.16 (t,  $J = 12.0$  Hz, 2H);  $^{13}\text{C}$  NMR (100 MHz,  $\text{CDCl}_3$ ):  $\delta$ . 137.38, 123.70, 123.03, 49.56, 36.39, 32.01, 19.27, 13.29. HRMS  $m/z$  calc'd for  $\text{C}_{13}\text{H}_{16}\text{ON}_2\text{Fe}$ : 273.0690; found: 273.0691.

### 4. Surface Functionalization:

**Immobilization of ferrocene derivatives :** (Approx. 1x1 cm) glass were washed with piranha solution (Caution : Piranha solution reacts violently so use carefully) and immediately dipped in a solution of (3-glycidyloxypropyl) trimethoxysilane (GOPTMS) (0.5 M) in 2 ml toluene. The substrates were heated at 85 °C for 52 hrs in a pressure tube. Samples were then rinsed with toluene to remove excess of GOPTMS. Next, GOPTMS coated glass slides were dipped in a solution of **L-1** ( 0.02 M) in ethanol for 24 h and rinsed with ethanol to remove excess of ferrocene linker and to neutralize epoxide group.

**Immobilization of cyclodextrin derivatives:** Freshly prepared ferrocene glass substrate (modified with **L-1**) was washed twice with ethanol and immersed in solution of either **C-1** or **C-2 or C-3** (10  $\mu\text{M}$  solution in deionized water) for 30 mins. The samples were rinsed with water, dried under a stream of nitrogen and used bacterial assay.

### 5. Time-of-Flight Secondary Ion Mass Spectrometer (SIMS-TOF) Characterization.

Time-of-Flight Secondary Ion Mass Spectroscopy (ToF SIMS) is a surface sensitive Spectroscopy that uses a pulsed Primary Ion beam to induce the desorption and ionization of atomic and molecular species from a solid sample surface. Approximate (20mmx20mmx20mm) silica wafer was coated with **L-1** followed by and the elementary composition was characterized by TOF-SIMS.

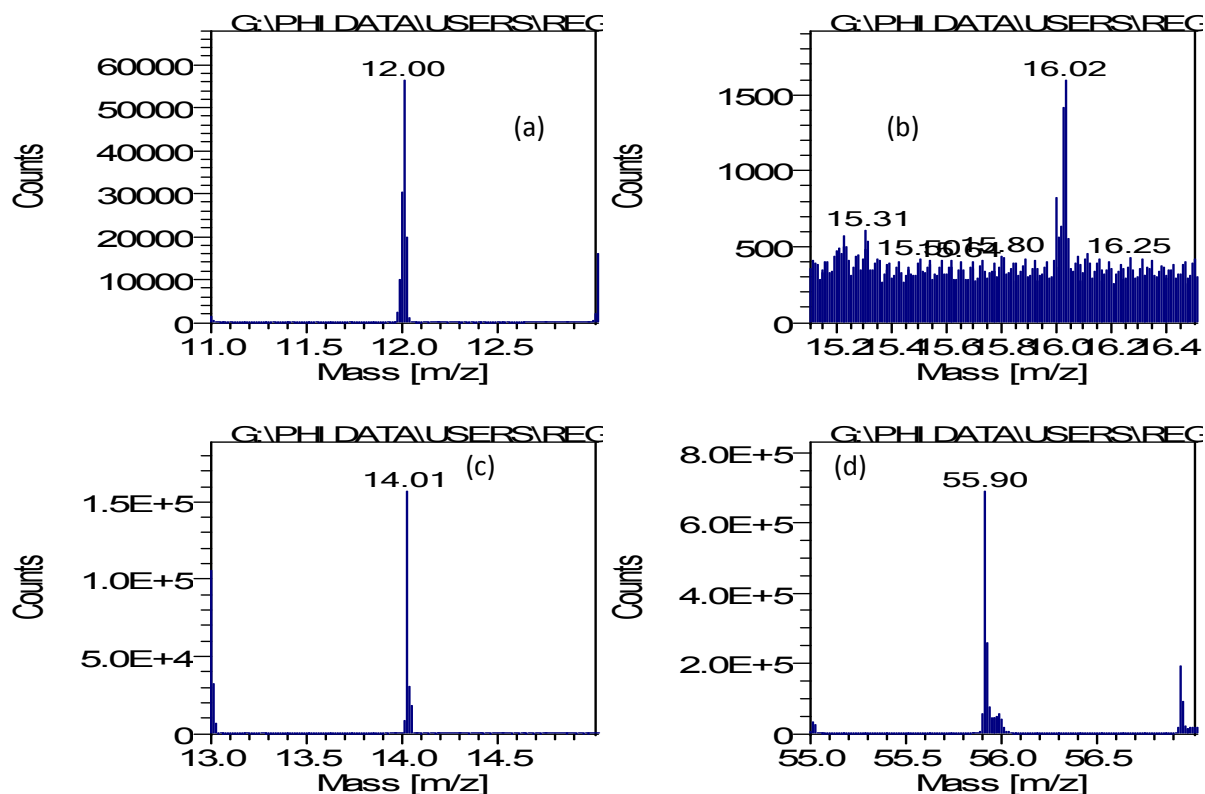

**Figure S1.** TOF-SIMS mass spectra of individual elements on L-1 coated surface: (a) carbon, (b) oxygen (c) nitrogen, (d) iron.

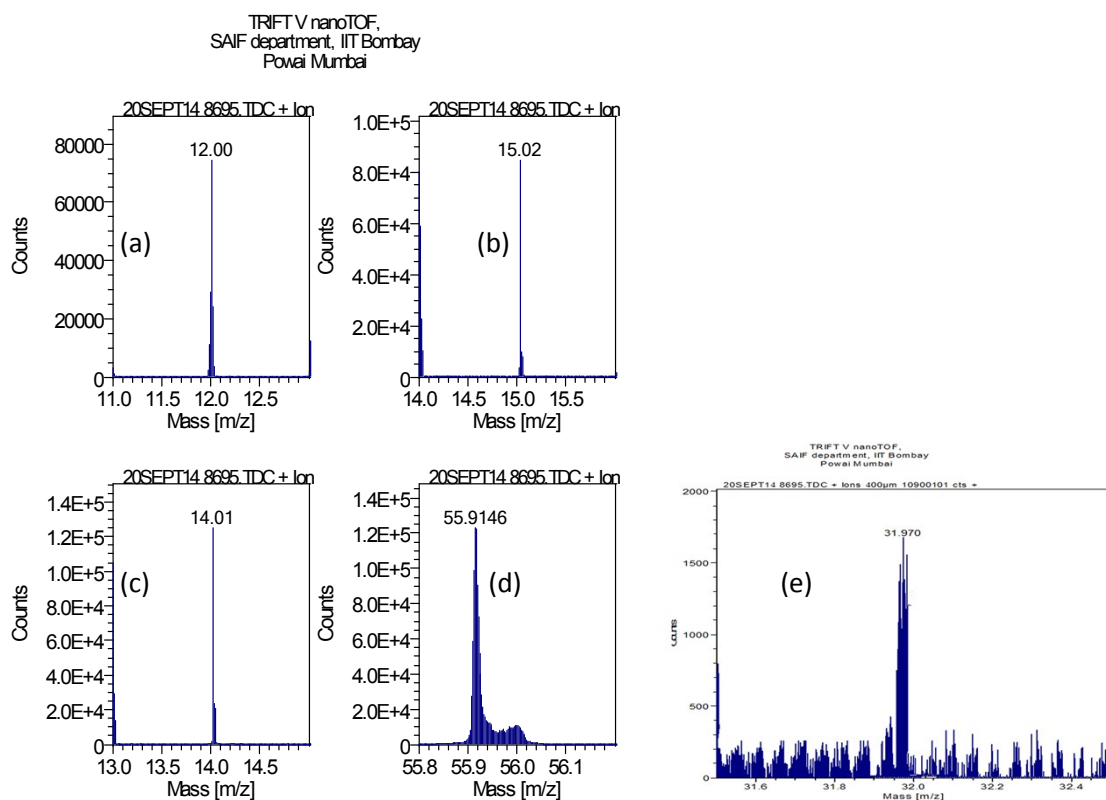

**Figure S2.** TOF-SIMS mass spectra of individual elements on L-1/C-3 coated surface: (a) carbon, (b) oxygen (c) nitrogen, (d) iron, (e) sulphur.

## 6. XPS Analysis

XPS is very important tool to analyse the chemical composition of molecules on surfaces. We used this method to confirm the conjugation of **L-1** and **C-2** on glass slides. Carbon 1s spectrum for **L-1** is deconvoluted at 284.6 (C-C, C-H), 286.7(C-O), 287.5 (C-N) and 288.7eV(C=O) respectively. High resolution XPS spectrum of **L-1** revealed Fe 2p<sub>3/2</sub> and 2p<sub>1/2</sub> at 711.7 and 725.6 eV respectively, whereas nitrogen 1s spectrum was centered at 400.3 eV. This clearly indicates the presence of **L-1** linker on glass slides. Similarly, high resolution XPS of **C-2/L-1** confirm presence of sulphur 2P at 163.5 ev.

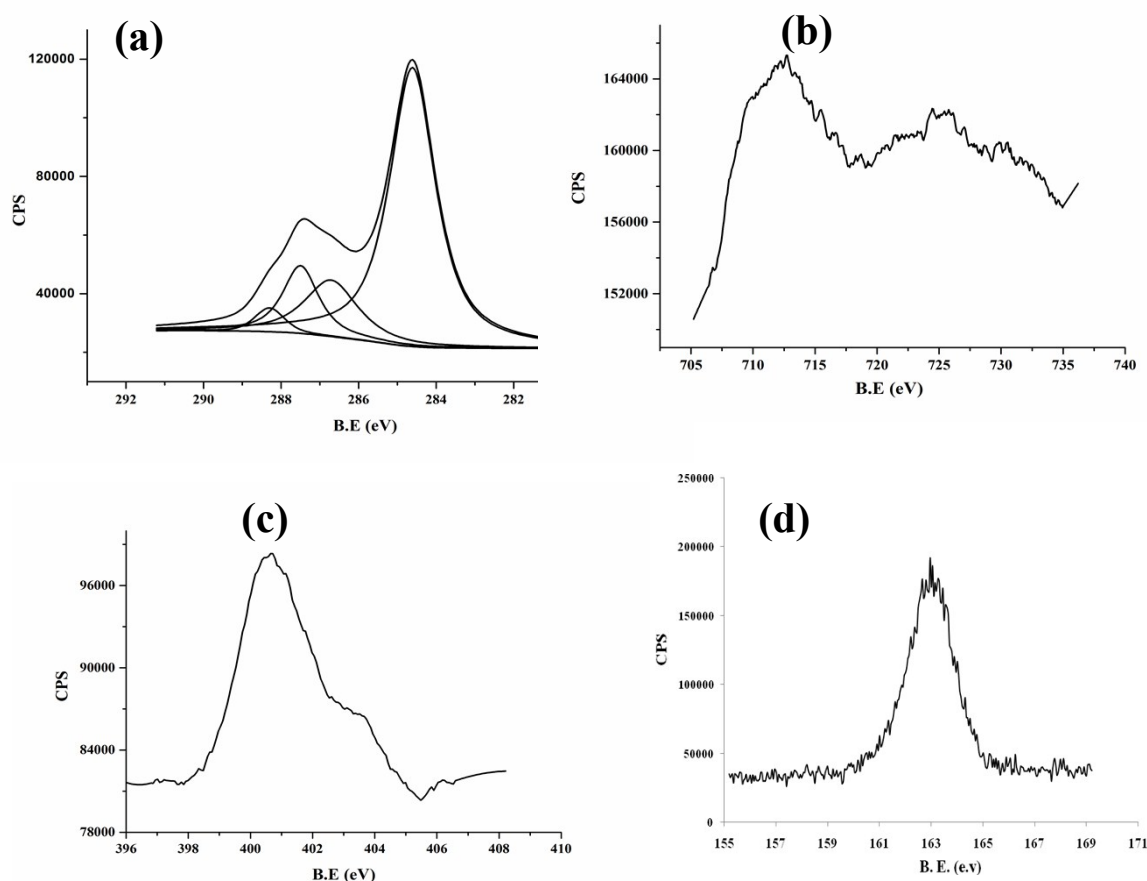

**Fig. S3.** XPS spectra of (a) C 1S ; (b) Fe 2P ; (c) N 1S of **L-1** coated glass slide and (D) S 2P of **C-2/L-1** glass slide.

**7. Bacterial Strains growth.** The mutants *E.coli* ORN178 and ORN208 were provided by Prof. Orndorff (College of Veterinary Medicine, Raleigh, NC United States) and *P. aeruginosa* was obtained from NCL bacterial bank. The bacterial cultures were grown overnight at 37°C until they reached an approximate OD<sub>600</sub> of 1.0.



### Bacterial detection.

2 ml aliquot of bacteria of approximate OD<sub>600</sub> of 1.0 was centrifuge to obtain a bacterial pellet. The resulting pellet was washed twice with PBS buffer and resuspended in 2 ml PBS and adjust the concentration to 10<sup>8</sup>. Different sugar coated glass slides were dipped in this solution for 30 mins and the glass slides was rinsed with PBS, followed by distilled water to remove non-specific bindings. These slides were mounted on fluorescent microscopic slides to image the bacteria.

**8. Concentration dependent studies.** The concentration of the bacteria was calculated by using growth promotion curve. 2 ml solutions of different dilution of bacteria were prepared and sugar coated glass slides (**C-2/L-1** with *E. coli* ORN 178 and **C-3/L-1** with *P.aeruginosa*) were immersed for 30 mins. Slides were washed with distilled water and images were collected. Quantification of bacteria was done by measuring relative fluorescence unit.

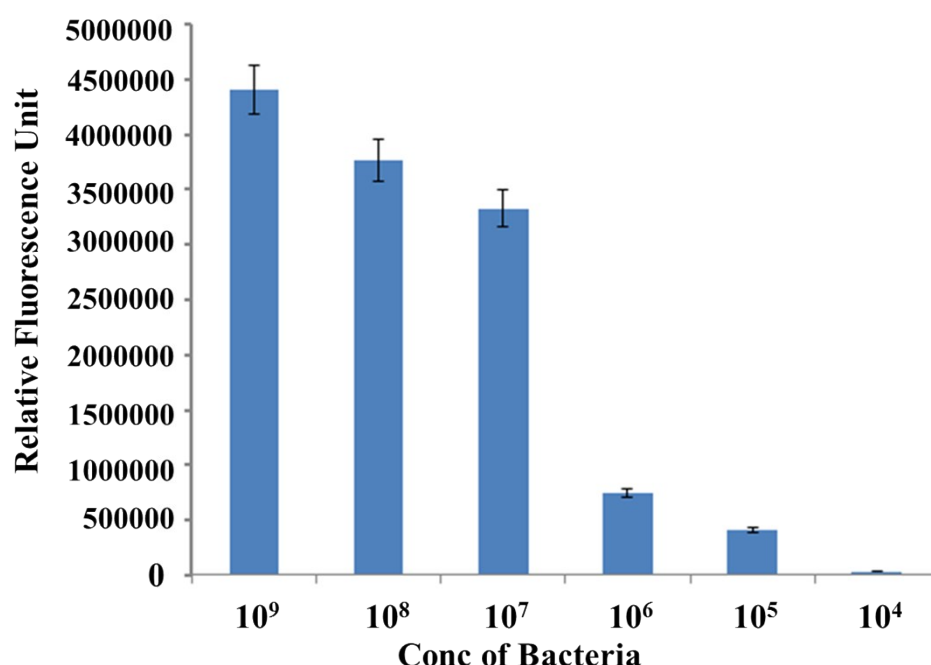

**Fig. S4.** Quantitative analysis of bacterial adhesion on **C-2/L-1** surface (200 X 200  $\mu$ m) n =5.

**9. Rewriting the sugar substrate for continuous bacterial sensor.** A stock solution of 0.1 mM of adamantyl carboxylic acid in ethanol water was prepared. The glass substrate having bacteria and host-guest complex was immersed in above solution for 5 mins. The sample was then rinsed with PBS, deionized water and then dried under a stream of N<sub>2</sub>. This substrate was once again incubated in a solution of **C-2** or **C-3** (10  $\mu$ M) for 30 min, to obtain the regenerated substrate used for bacterial sensing.

**10. Estimation of the concentration of sugar on glass slides ;**

The concentration of mannose sugar on glass slide was determined by the phenol-sulfuric acid method. A sugar functionalized-glass slides was dipped in 0.5 ml of adamantane carboxylic acid (0.1 M) containing solution, 100  $\mu$ L of above solution, concentrated sulfuric acid (750  $\mu$ L, 100%) and aqueous phenol solution (5% w/v, 100  $\mu$ L) were added to the test tube and heated to 80°C. After 5 min, the plate was cooled to room temperature and the absorbance coefficient at 490 nm was measured. An adamantane carboxylic acid solution and sulfuric acid were used as a control. The mannose concentration was estimated by comparing the absorption of the sample with a standard curve. The number of sugar molecules per 1 X 1 cm plate was  $0.56 \pm 0.12 \mu$ M (n = 5). Same procedure was repeated during generation – degeneration processes to estimate the sugar concentration (Table S1).

| Cycle ( $\mu$ M) | 1 <sup>st</sup> cycle | 2 <sup>nd</sup> cycle | 3 <sup>rd</sup> cycle | 4 <sup>th</sup> cycle | 5 <sup>th</sup> cycle |
|------------------|-----------------------|-----------------------|-----------------------|-----------------------|-----------------------|
| <b>C-2</b>       | $0.52 \pm 0.04$       | $0.45 \pm 0.07$       | $0.49 \pm 0.06$       | $0.51 \pm 0.07$       | $0.49 \pm 0.08$       |

**Table S1.** Concentration of mannose after each generation-degeneration process (value represents average of three parallel experiments).

## 10. NMR

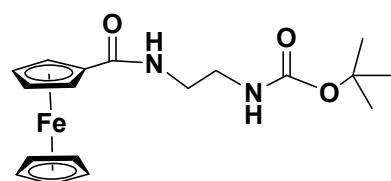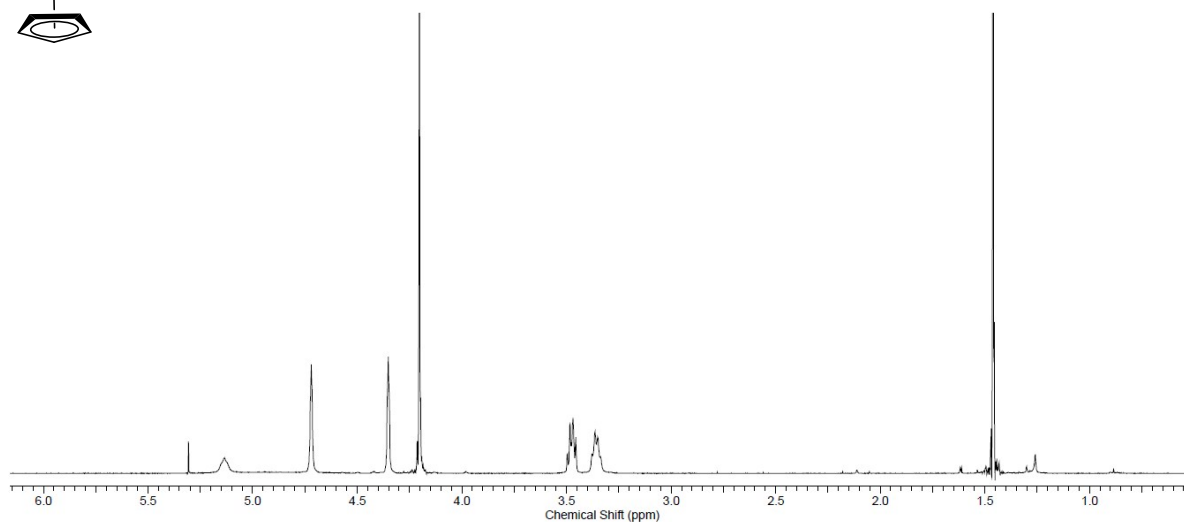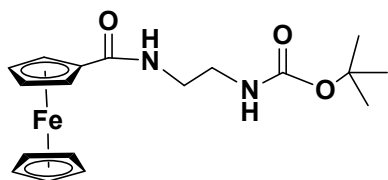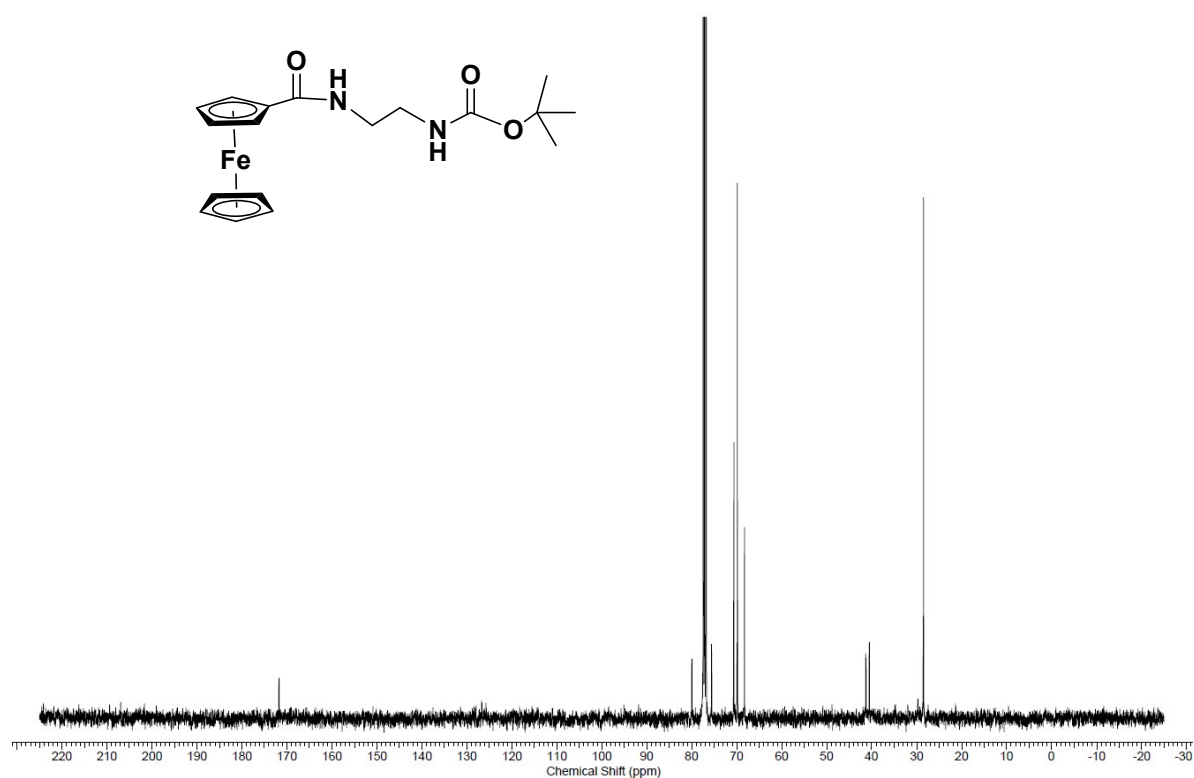

MH 235

MH 235 89 (1.633) AM2 (Ar,20000.0,556.28,0.00,LS 3); ABS; Sm (SG, 1x1.00); Cm (87:90)

IISER PUNE

1: TOF MS ES+  
8.95e5

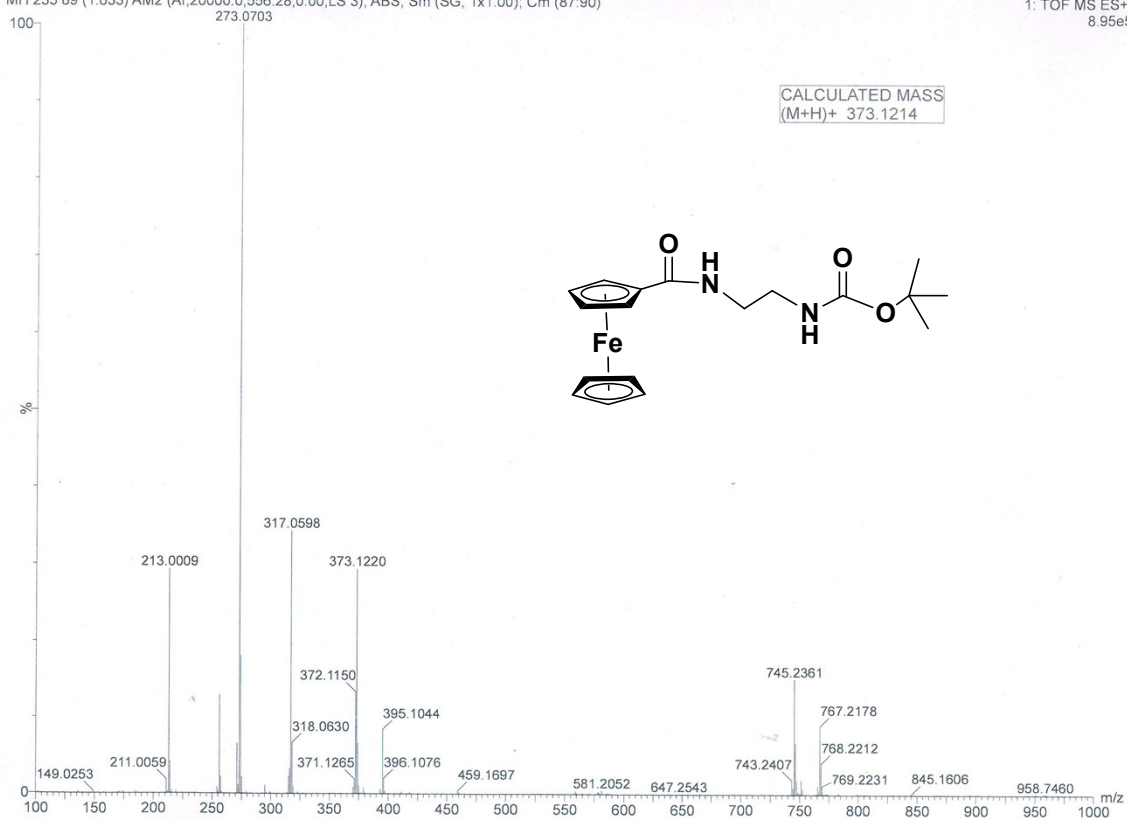

CALCULATED MASS  
(M+H)<sup>+</sup> 373.1214

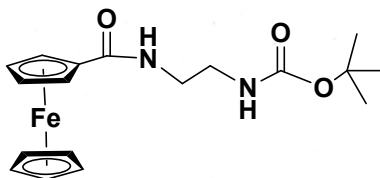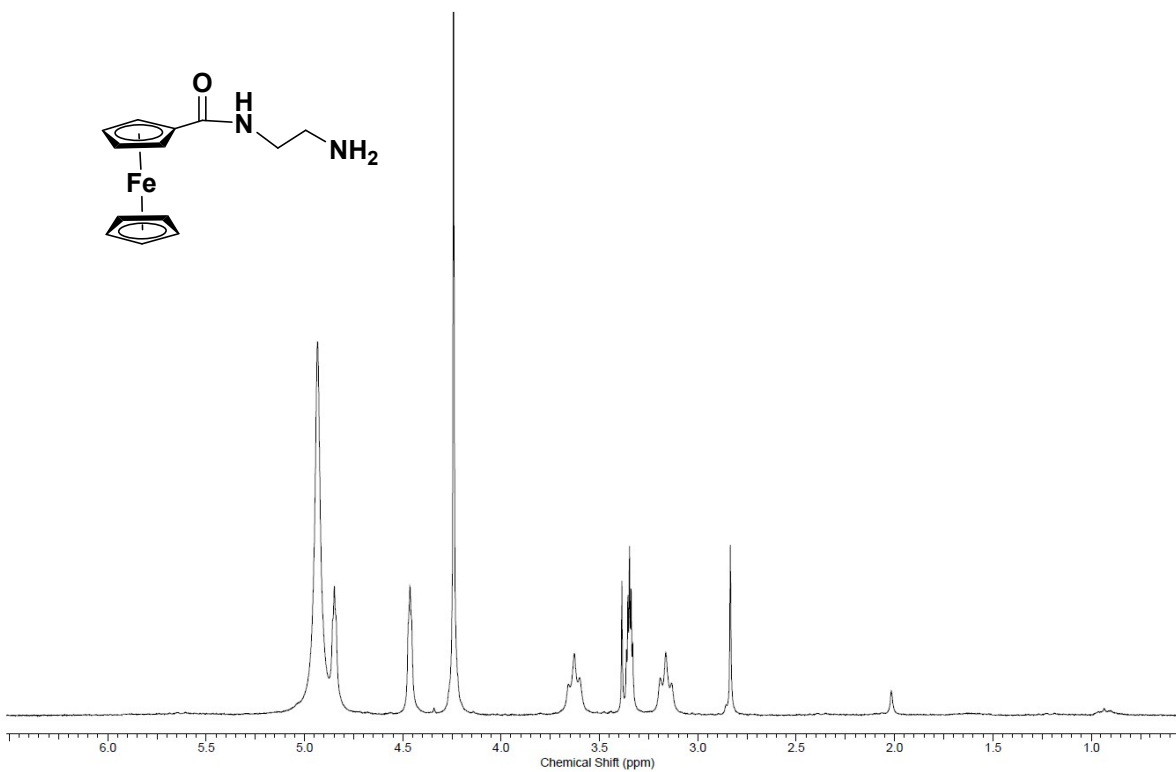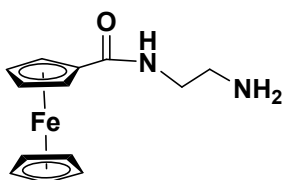

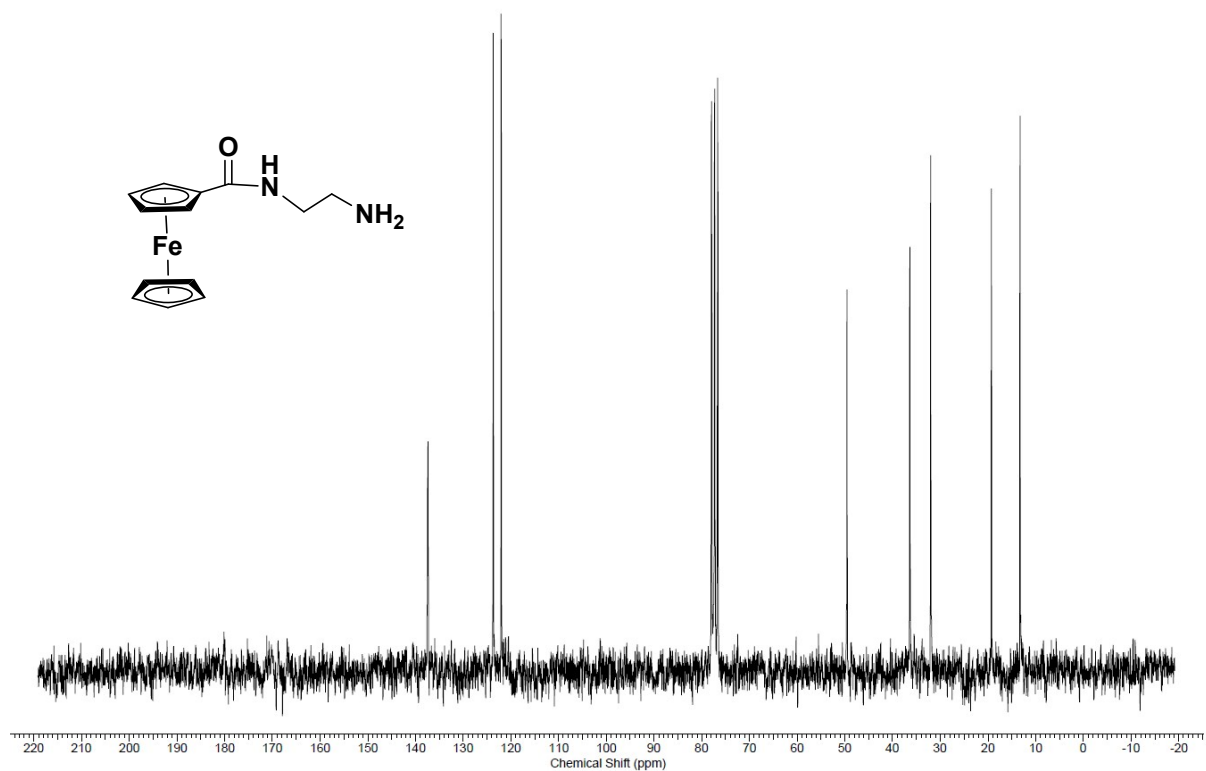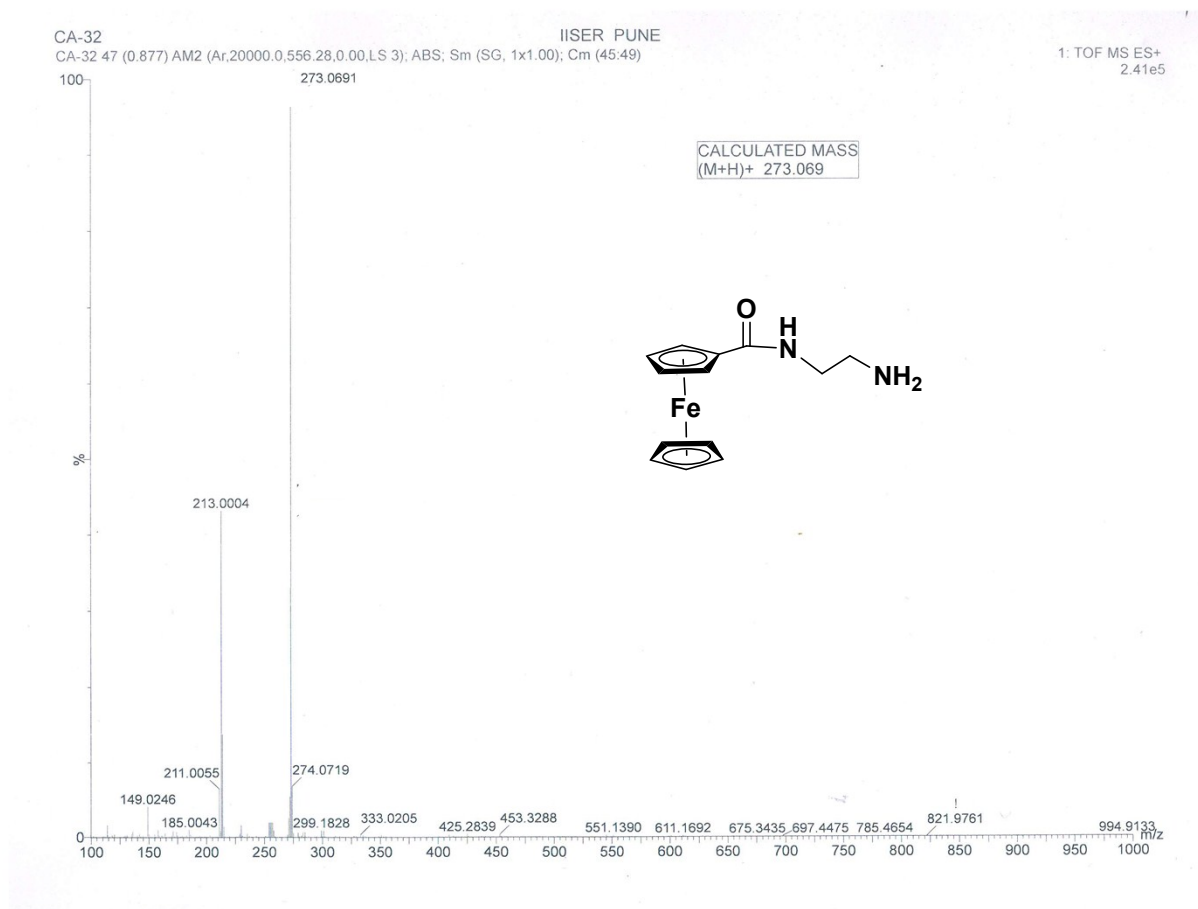

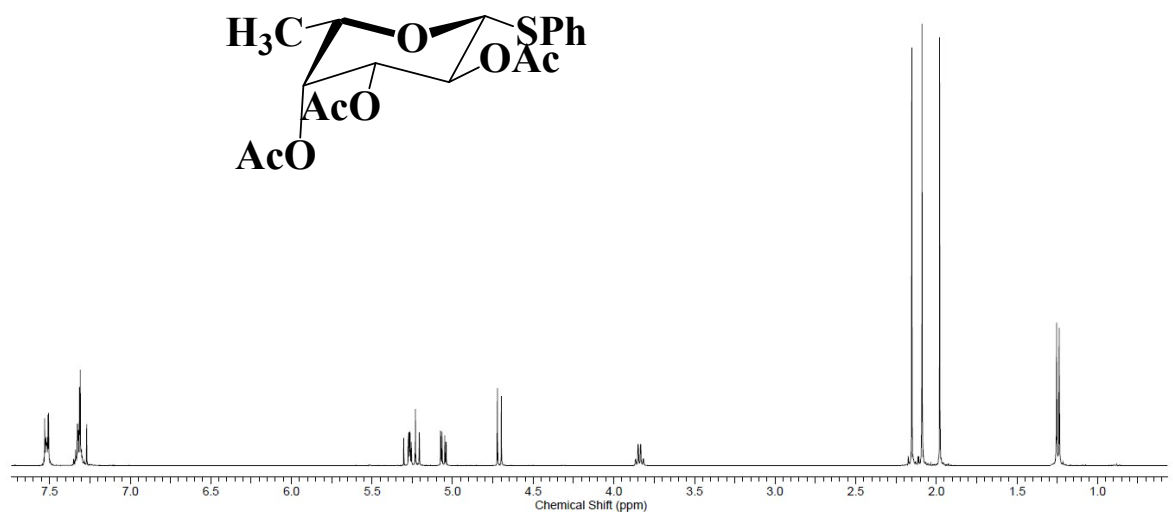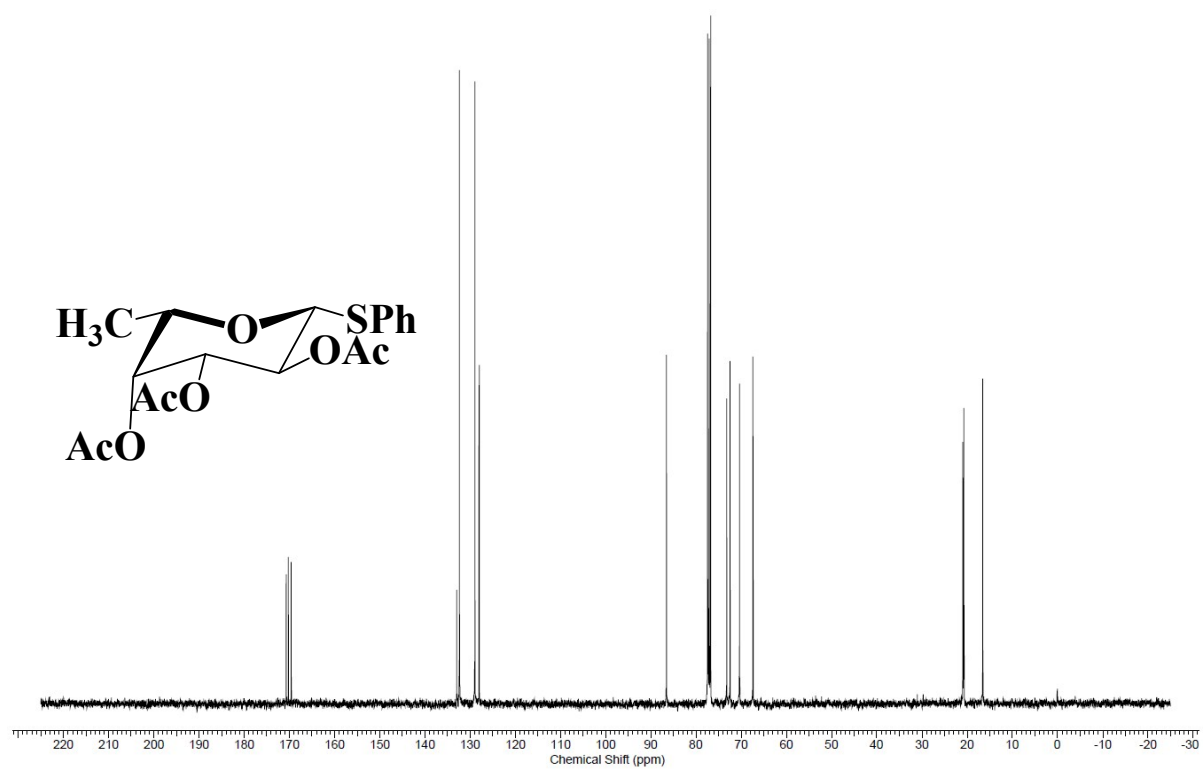

CA 27 106 (1.943) AM2 (Ar,20000.0,556.28,0.00,LS 3); ABS; Sm (SG, 1x1.00); Cm (104:108)  
405.0979

); Cm (104:108)

1: TOF MS ES+  
7.52e4

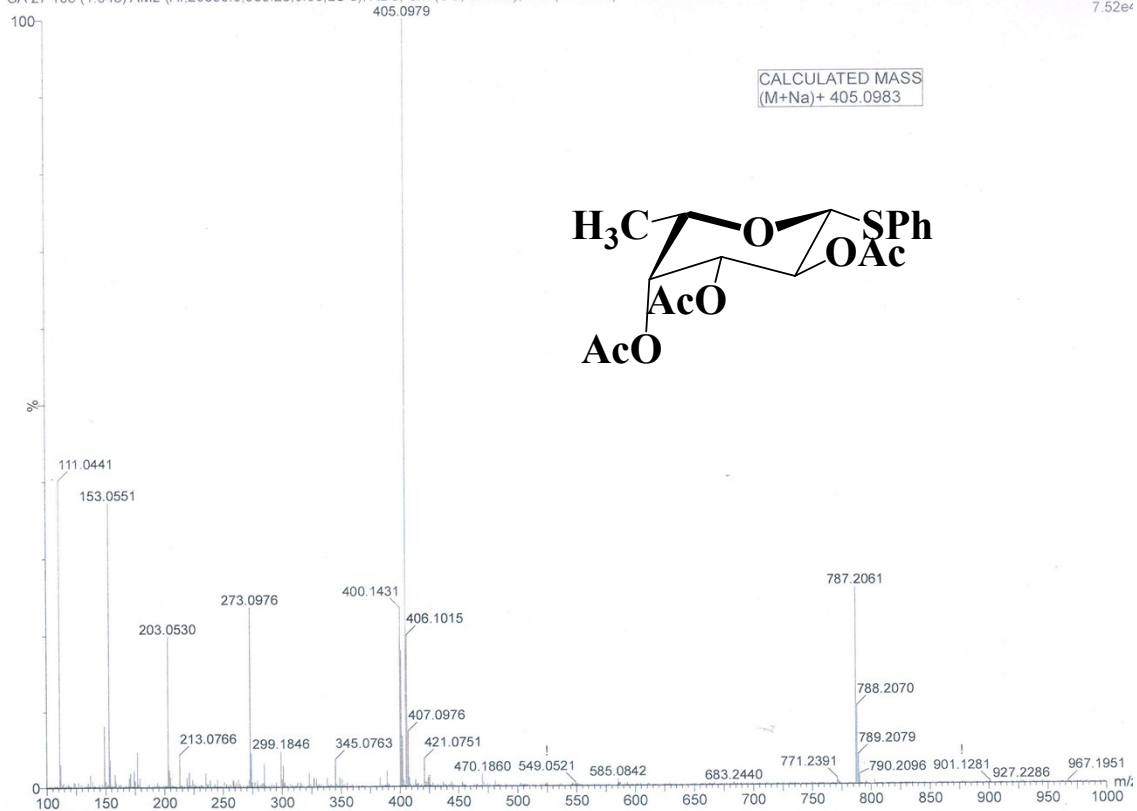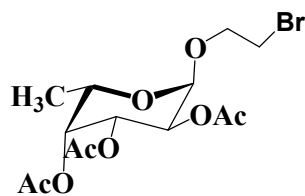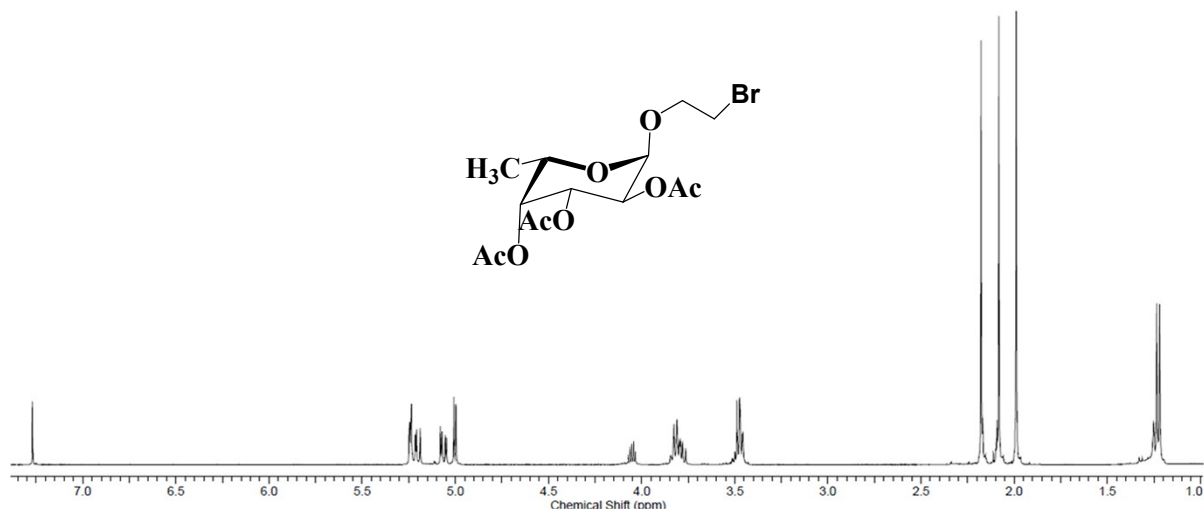

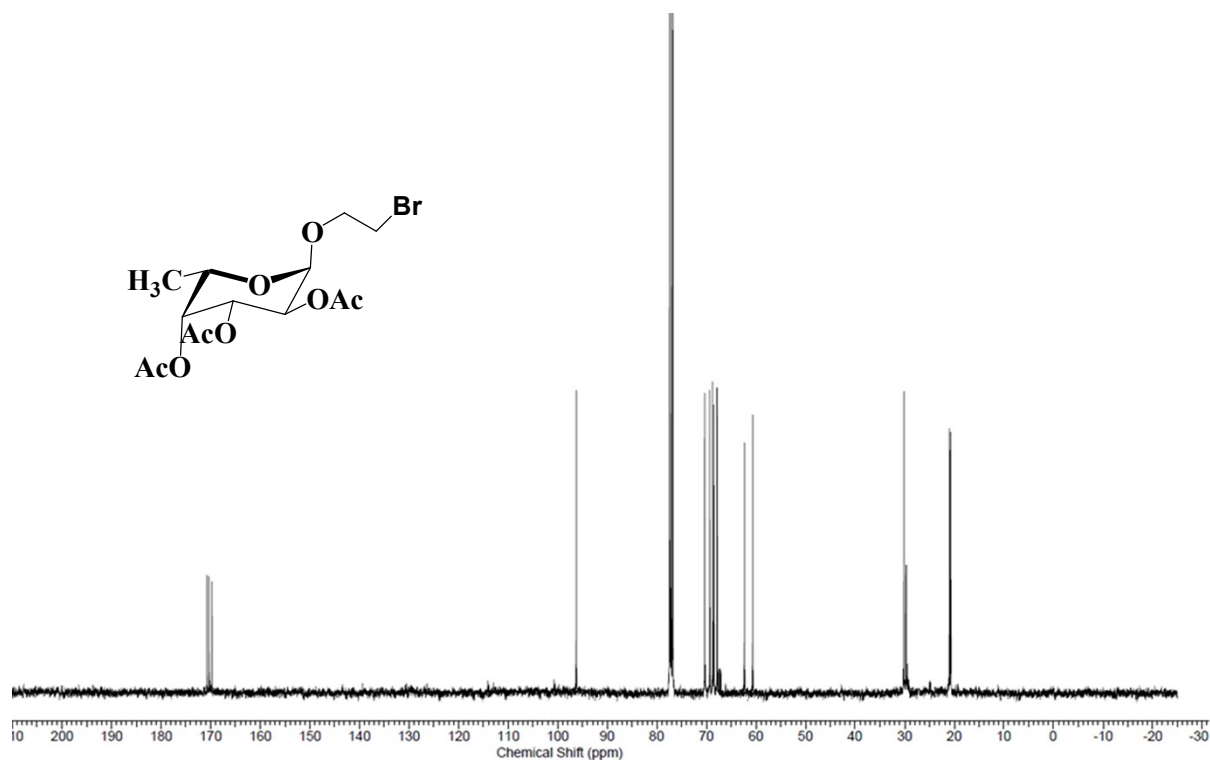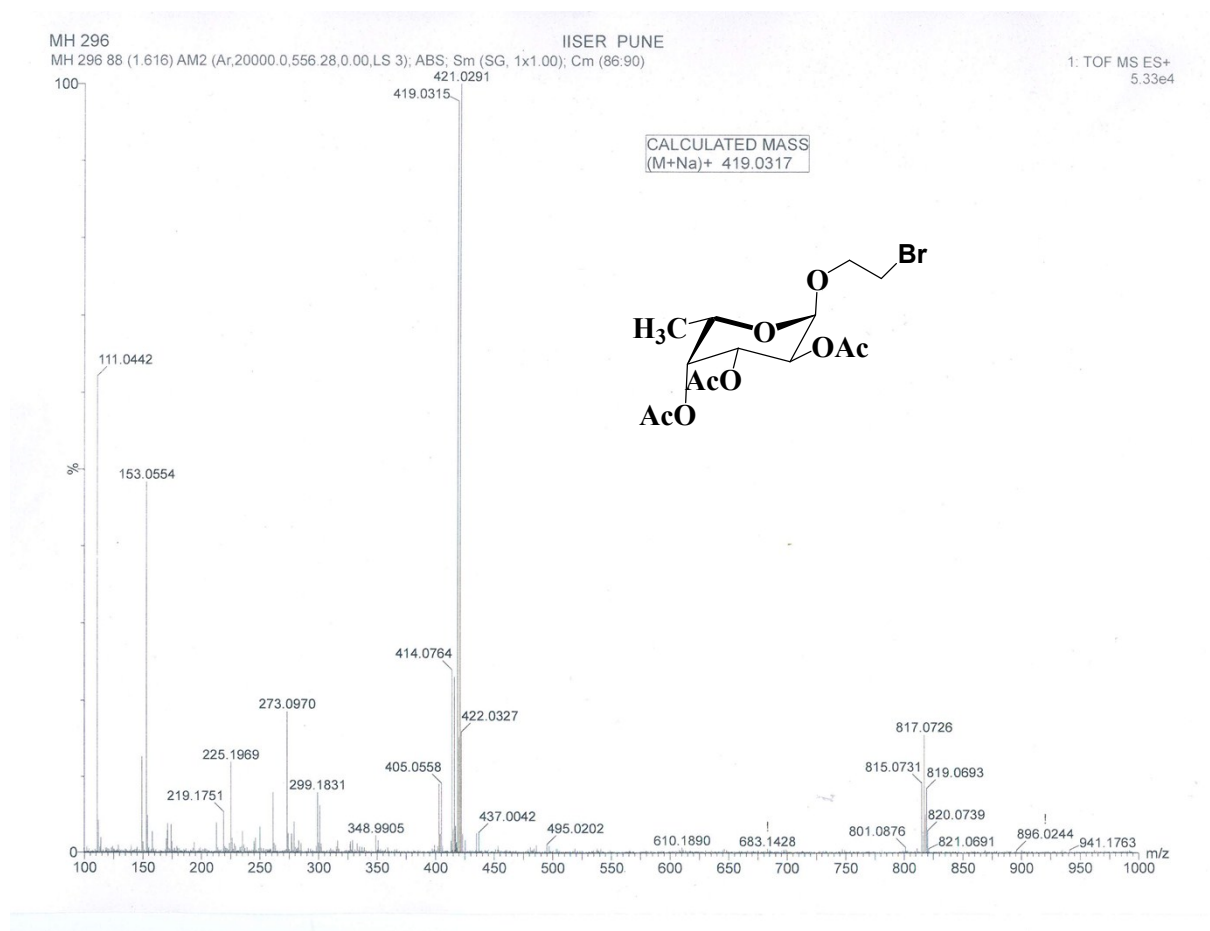



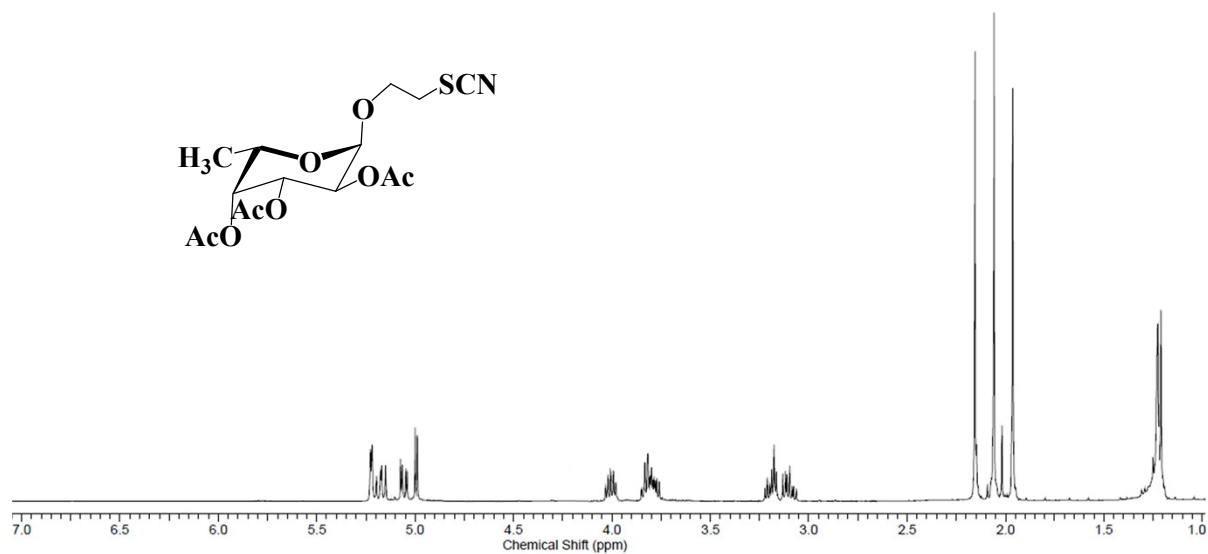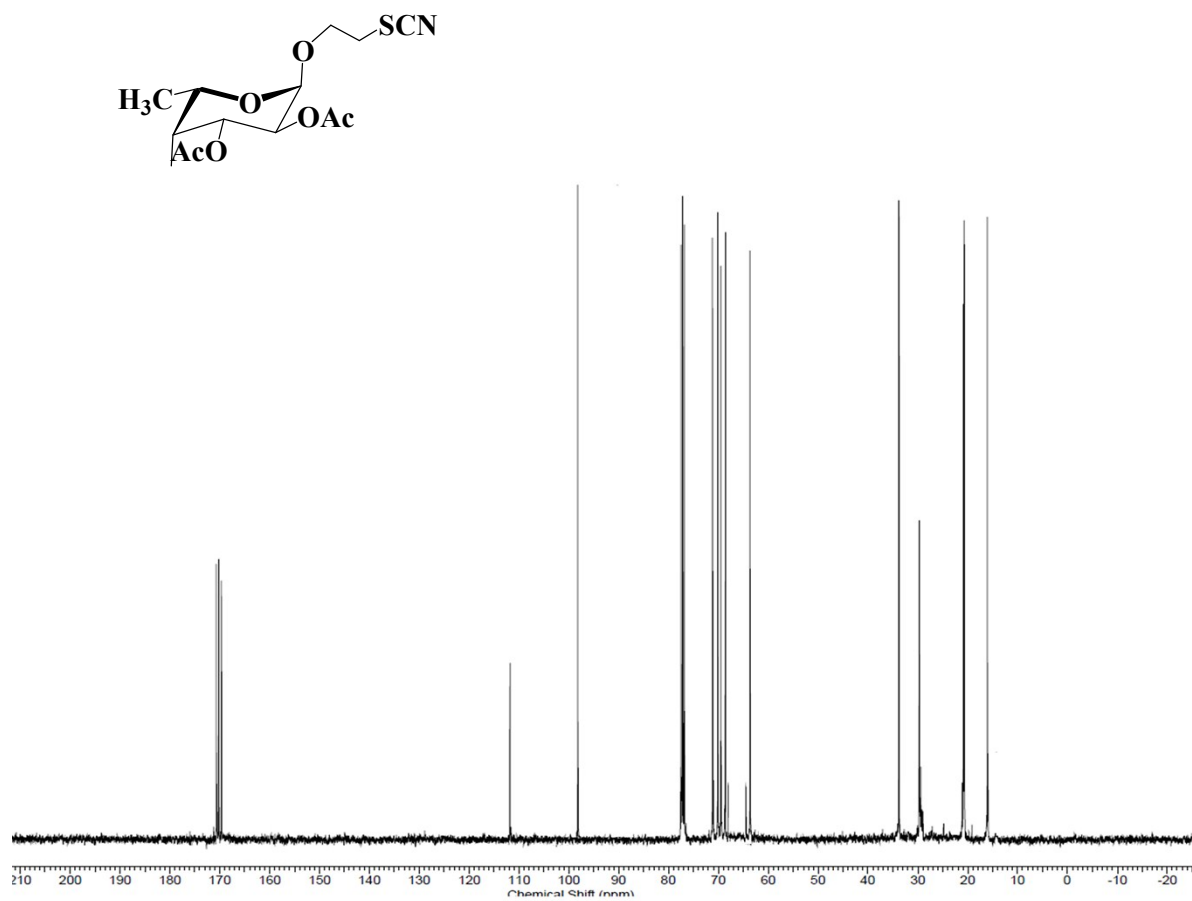

CA 29

IISER PUNE

CA 29 78 (1.445) AM2 (Ar, 20000.0, 556.28, 0.00, LS 3); ABS; Sm (SG, 1x1.00); Cm (78.83)

1: TOF MS ES+  
1.61e5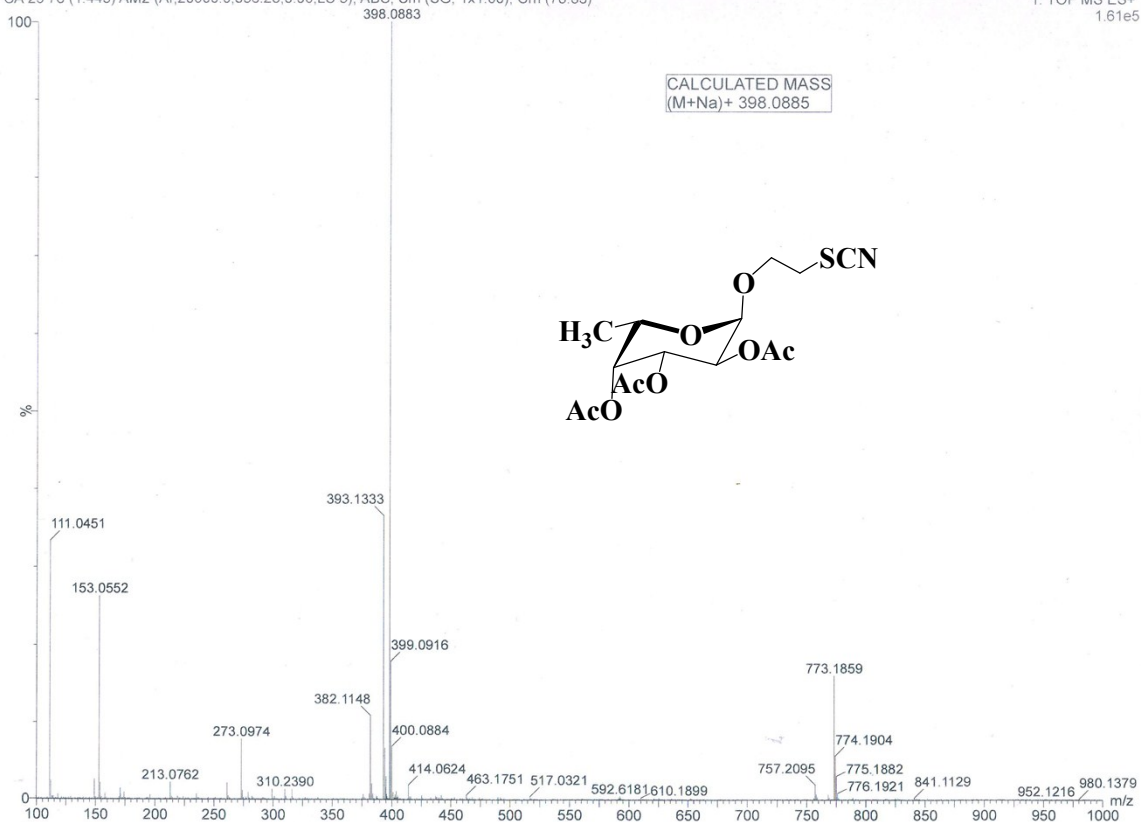

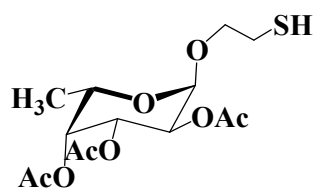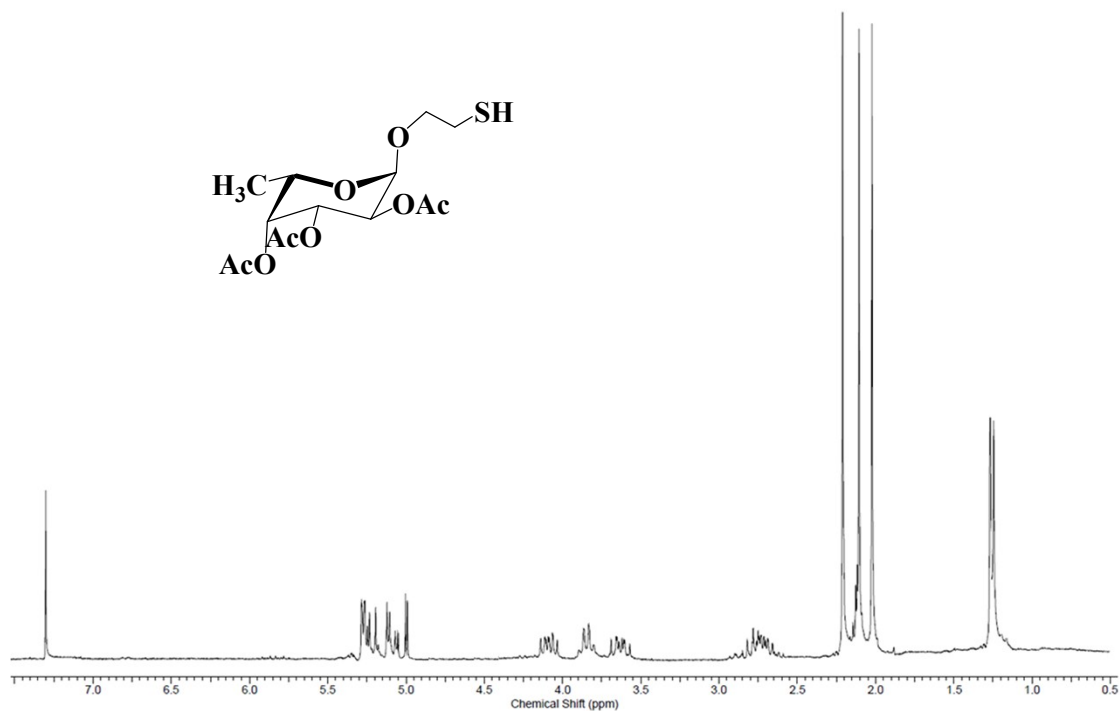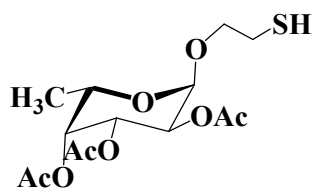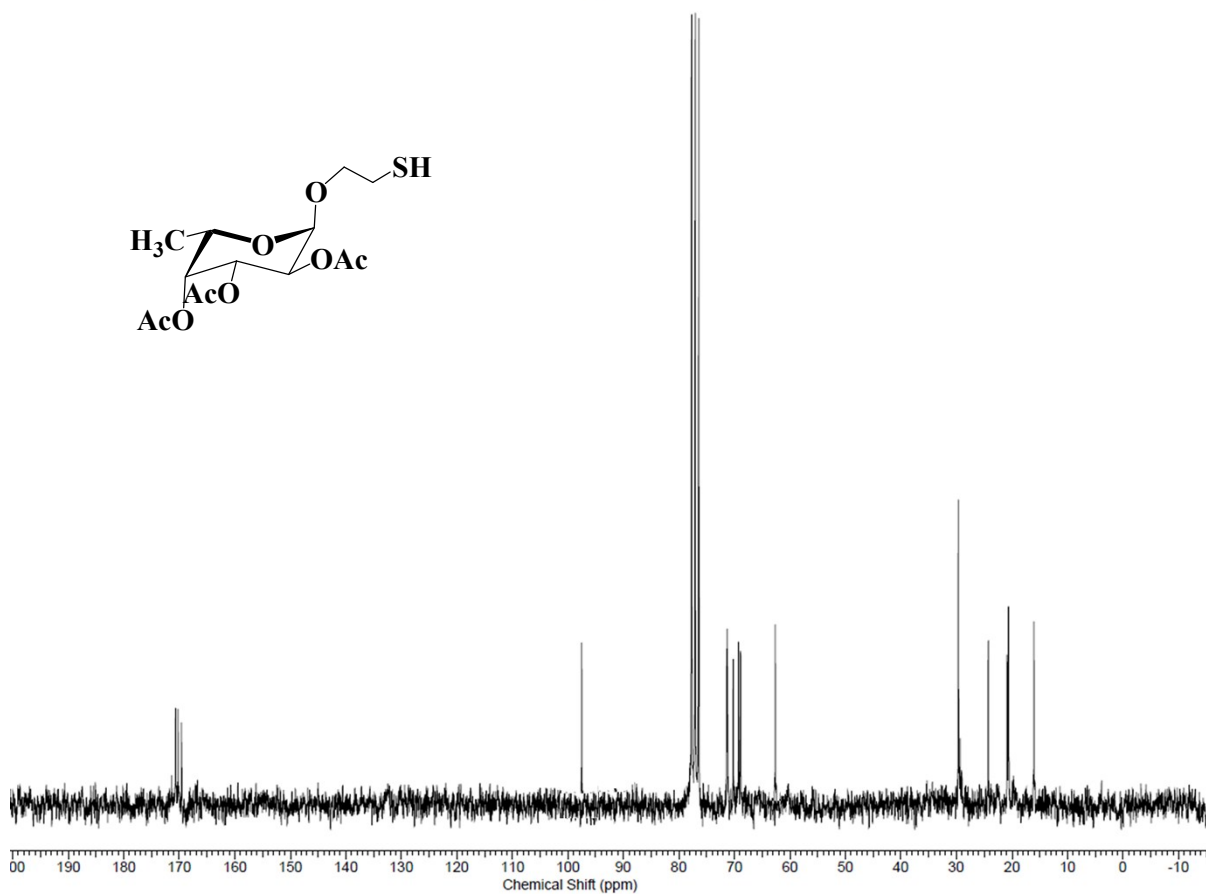

CA-30

IISER PUNE

CA-30 83 (1.531) AM2 (Ar,20000.0,556.28,0.00,LS 3); ABS; Sm (SG, 1x1.00); Cm (82:84)

1: TOF MS ES+  
2.58e4CALCULATED MASS  
(M+Na)+ 373.0932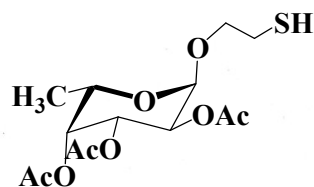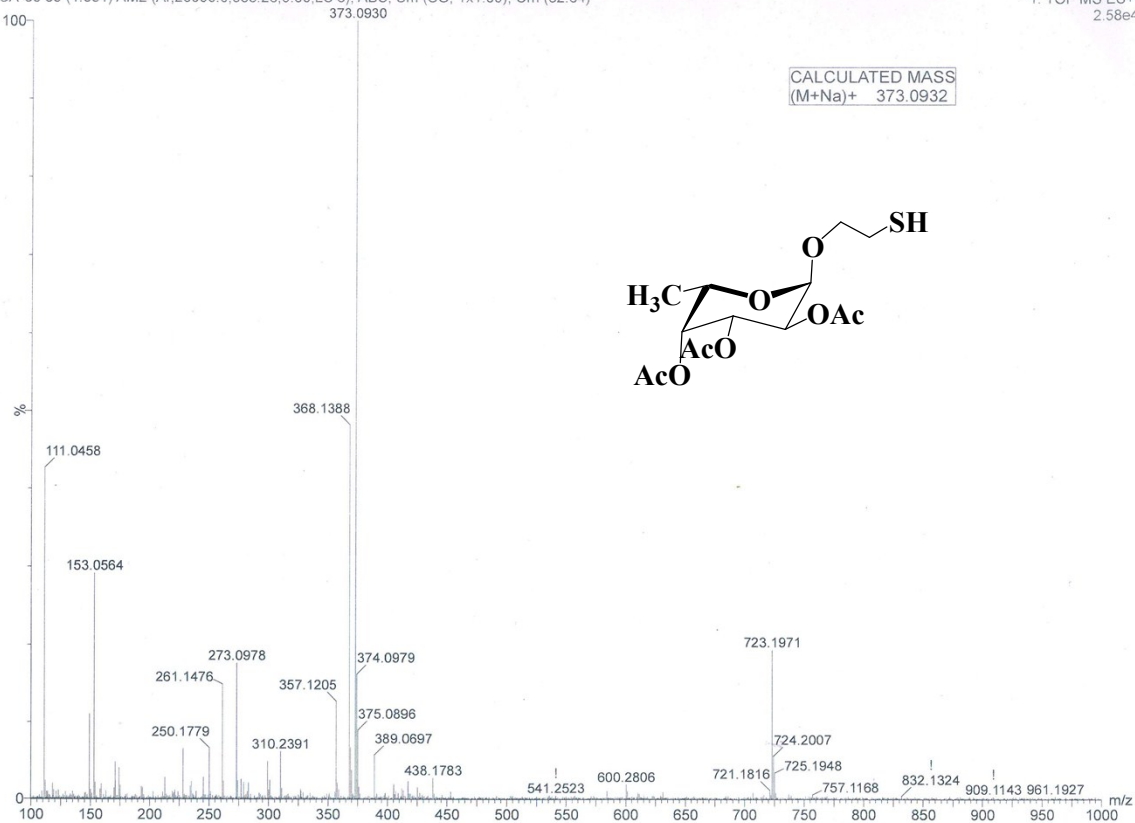

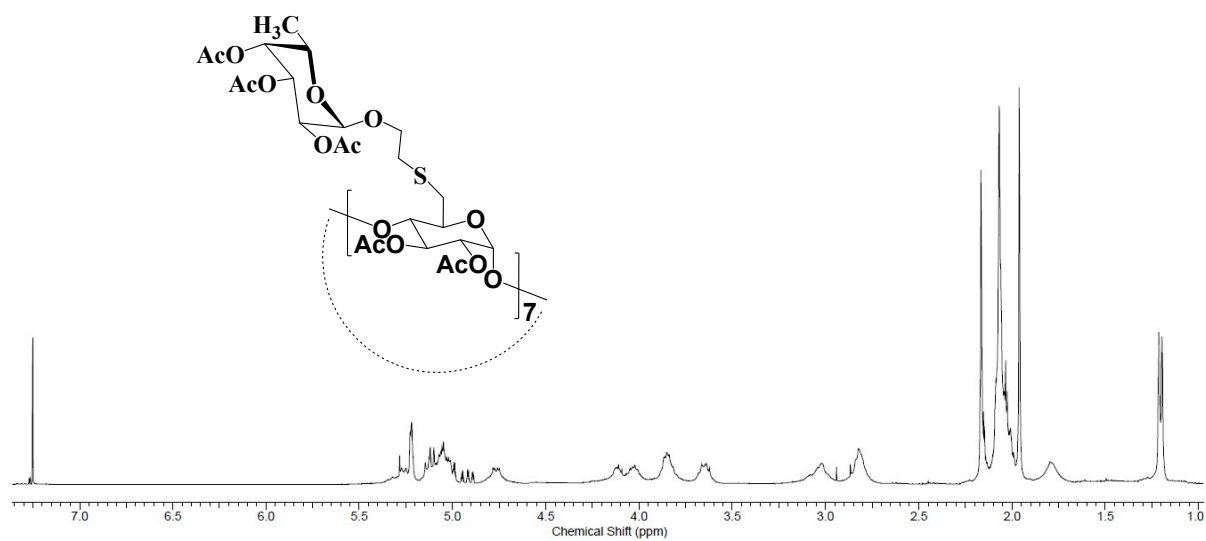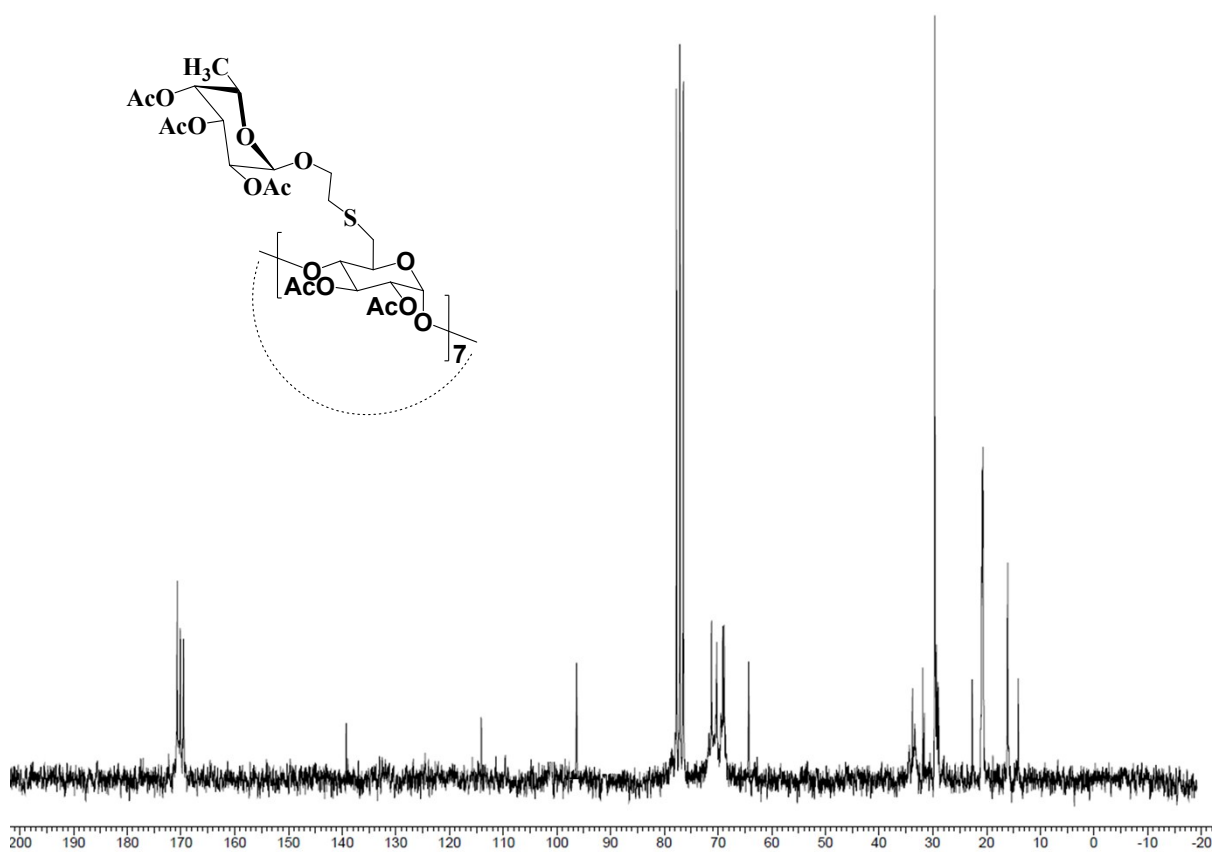

MH fu MS  
MH fu MS 2 (0.069) AM2 (Ar:20000.0,785.84,0.00,LS 3); ABS; Sm (SG, 1x1.00); Cm (2:54)  
IISER PUNE  
2047.4019

1: TOF MS ES+  
1.60e4

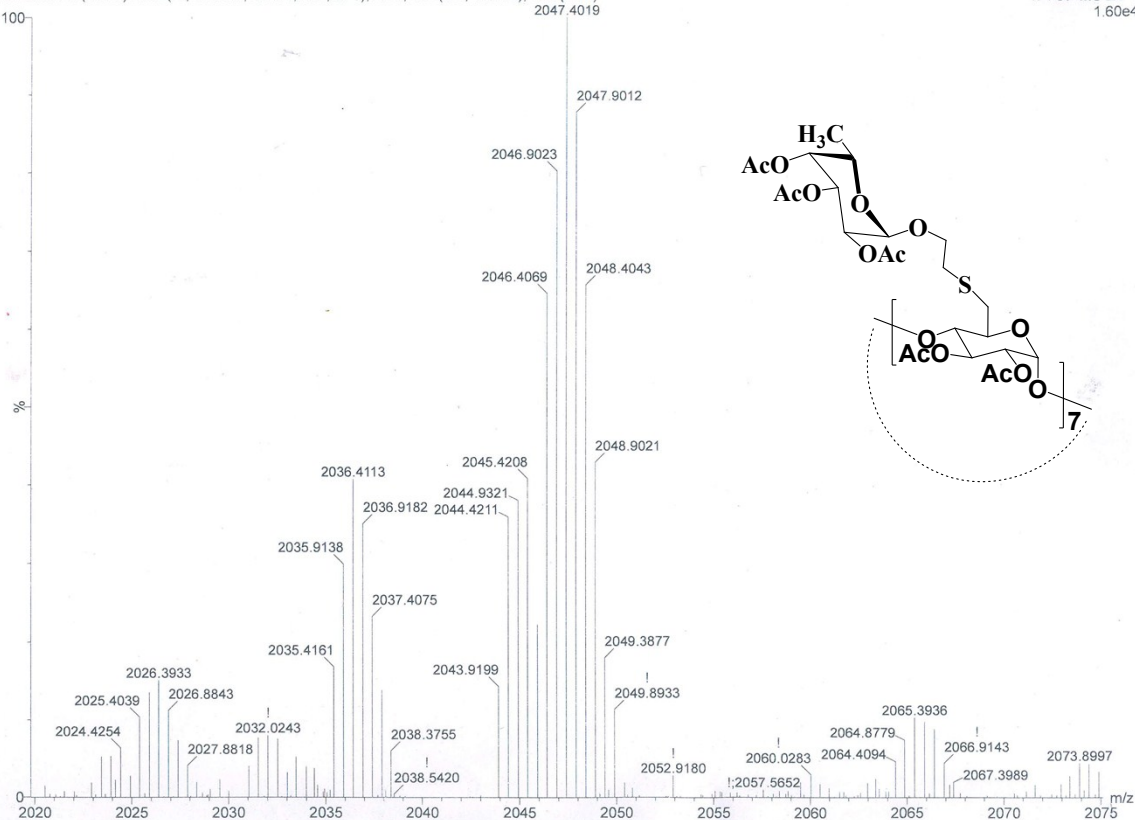

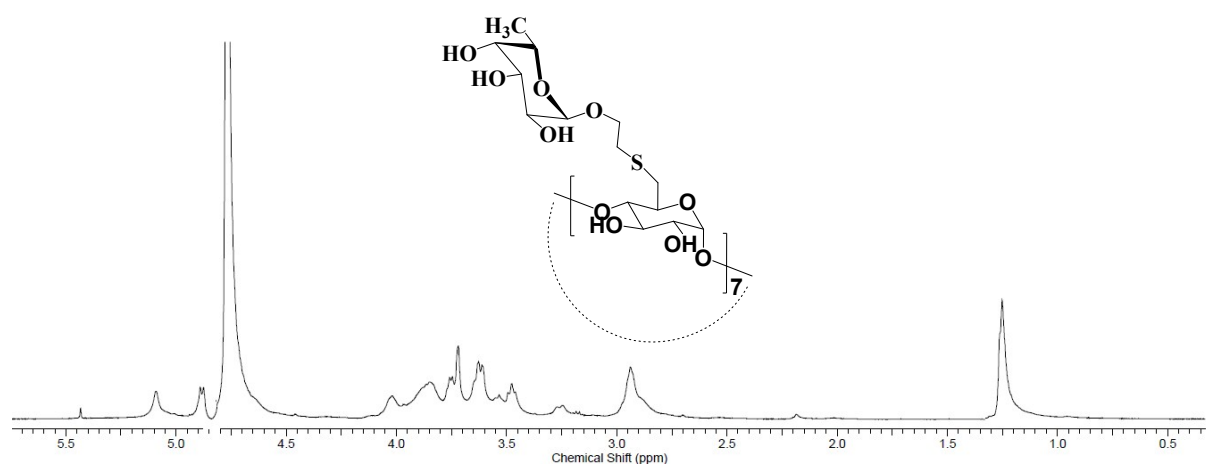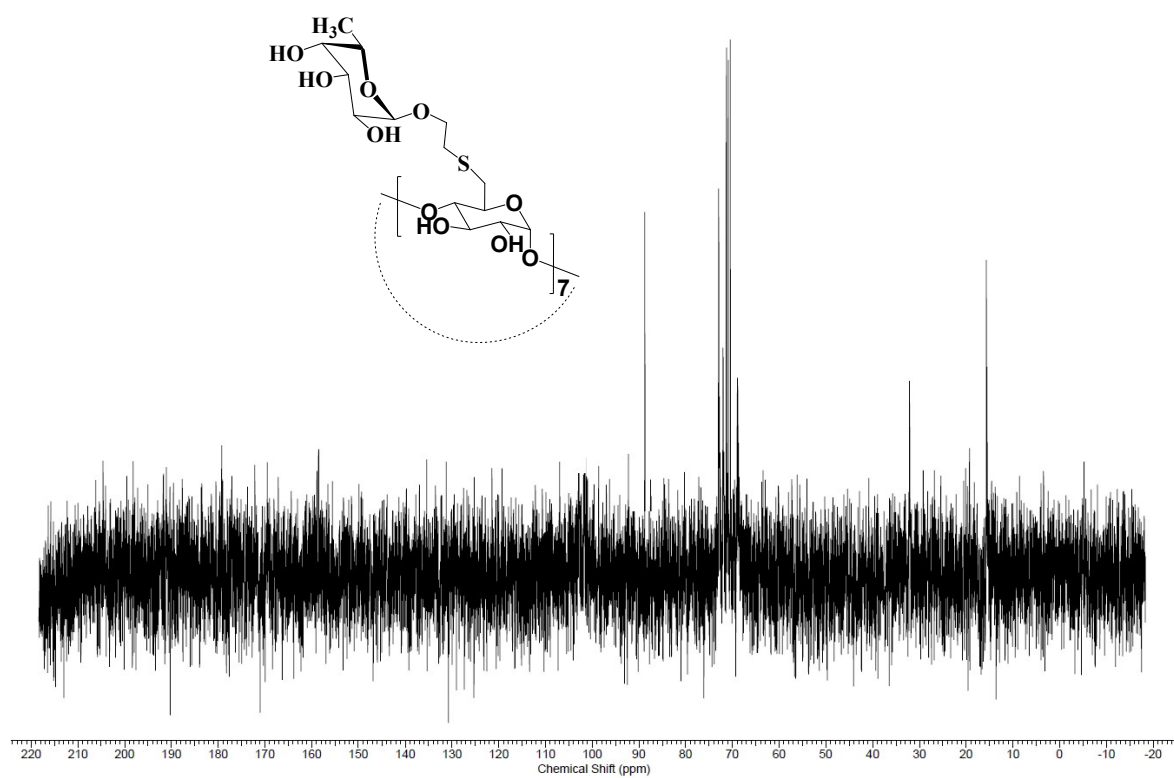

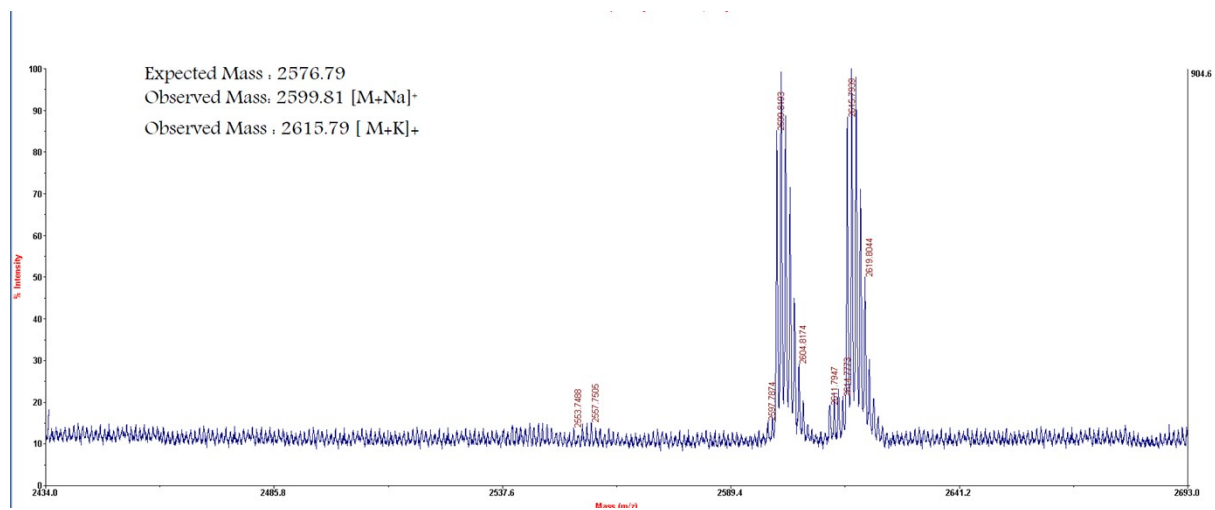

Supplement: c5cc01019e1.pdf [file c5cc01019e1.pdf]
